# Supplementary figures and images for: Modifying chemotherapy response by targeted inhibition of eukaryotic initiation factor 4A
Source: PubMed Central journal article supplement — Blood Cancer J. 2013 Jul 19;3(7):e128–. doi: 10.1038/bcj.2013.25 (PMC3730203; doi:10.1038/bcj.2013.25), 2013-07-19

**A**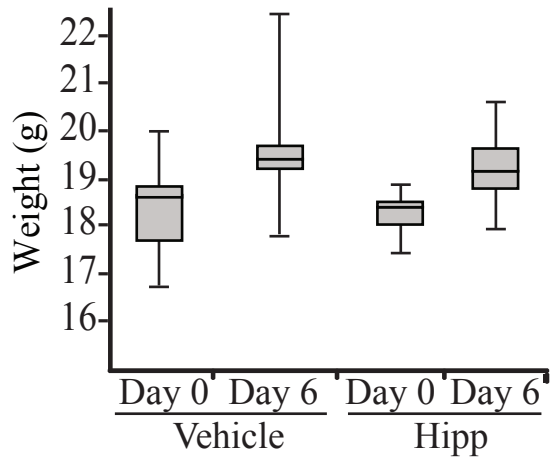**B**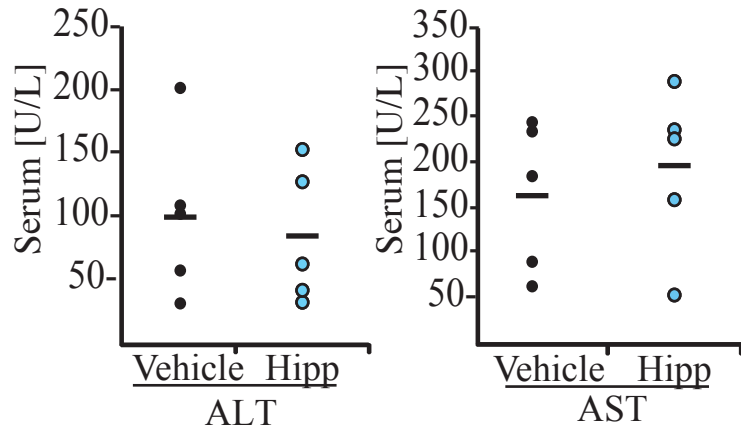**C**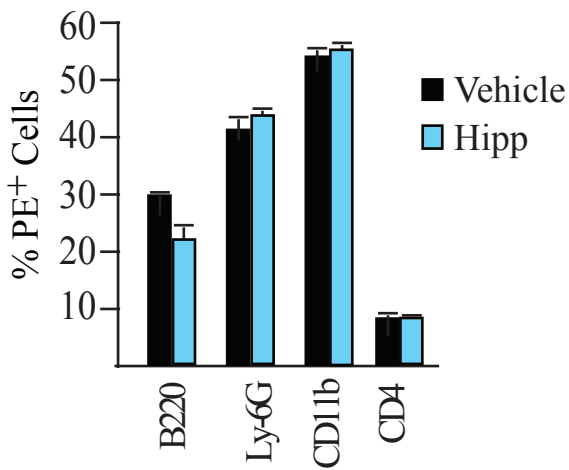**D**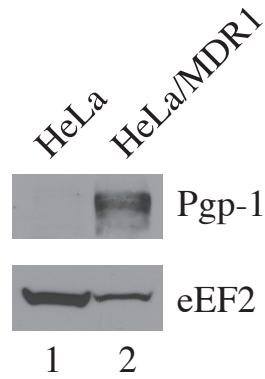**E**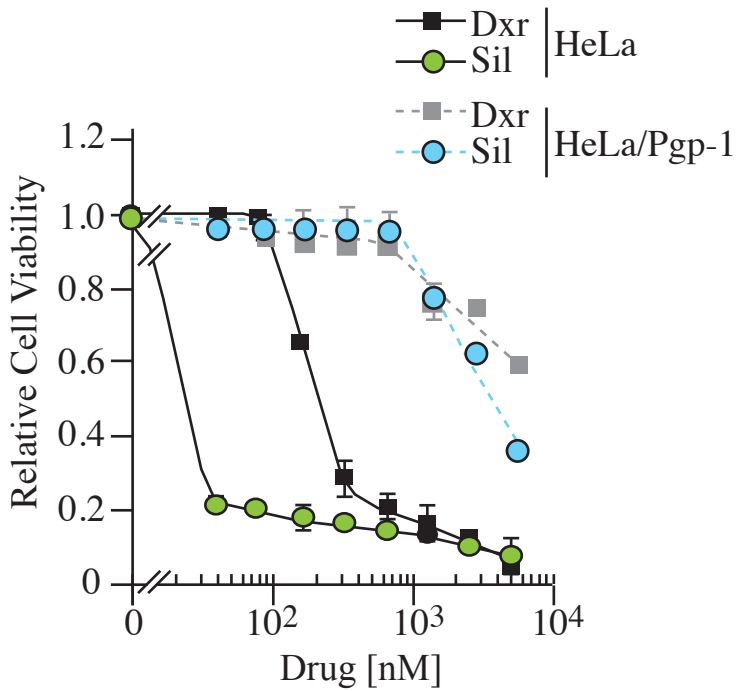**F**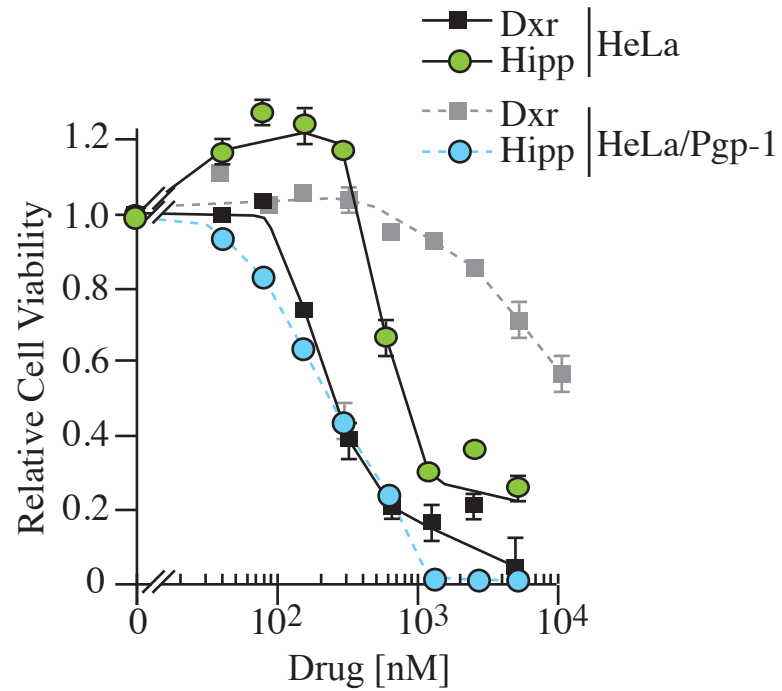

Supplement: bcj201325x2.pdf [file bcj201325x2.pdf]

**A**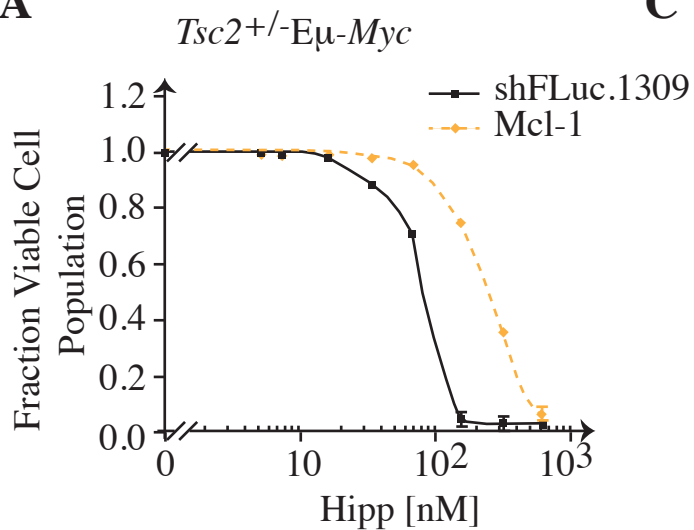**C**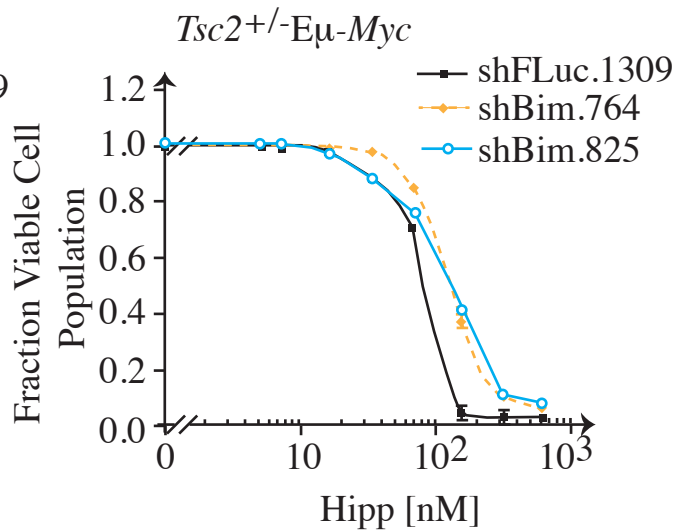**E**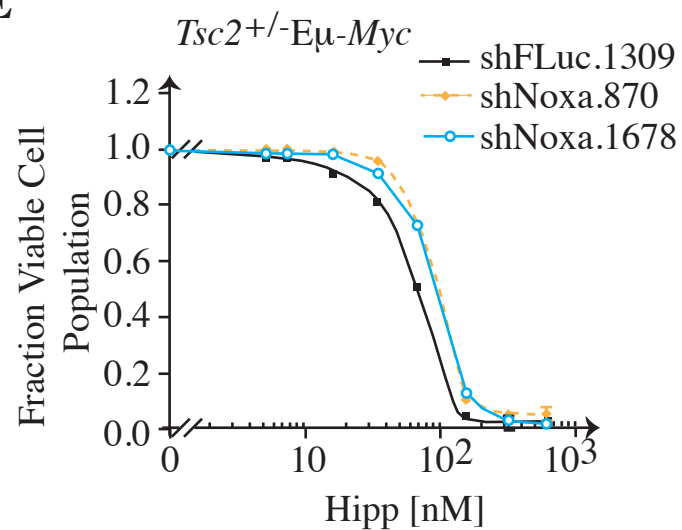**B**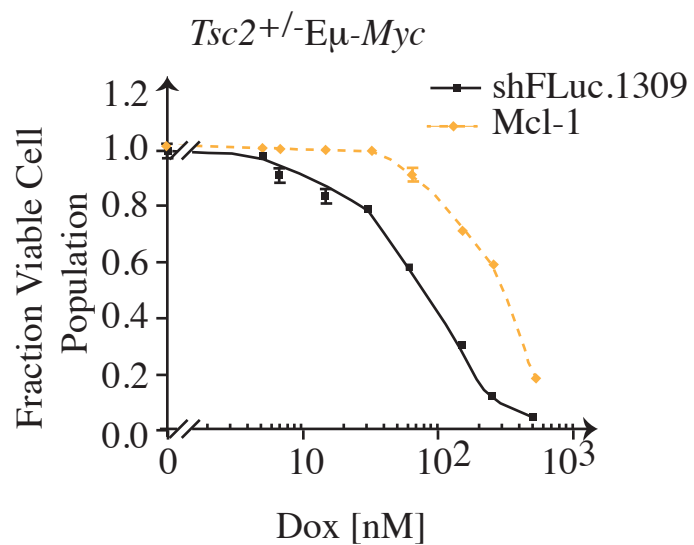**D**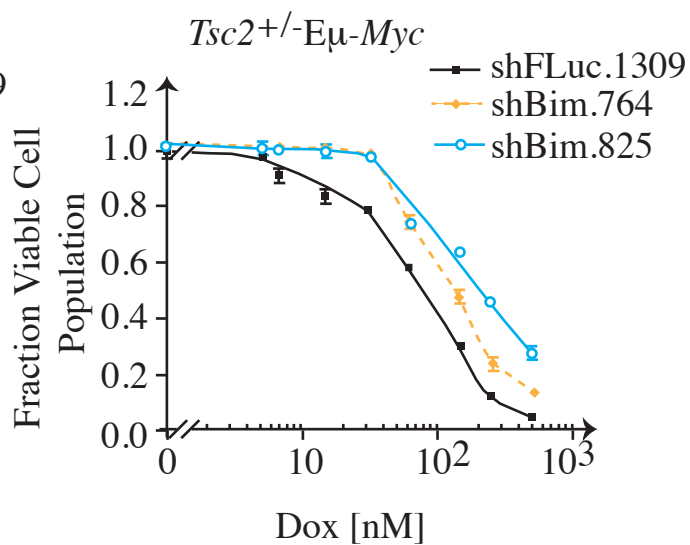**F**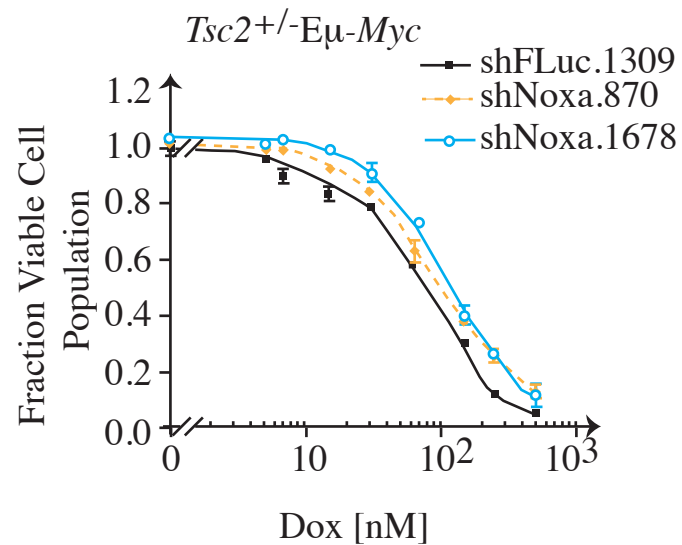

Supplement: bcj201325x3.pdf [file bcj201325x3.pdf]

**A**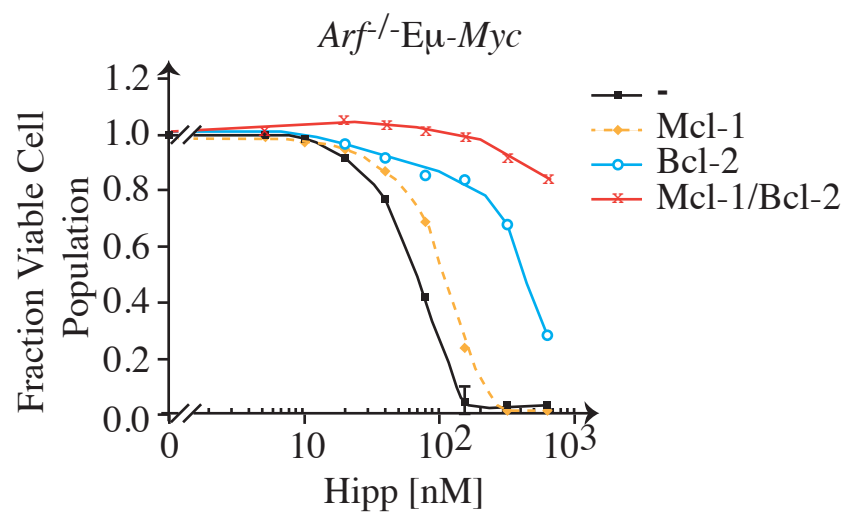**B**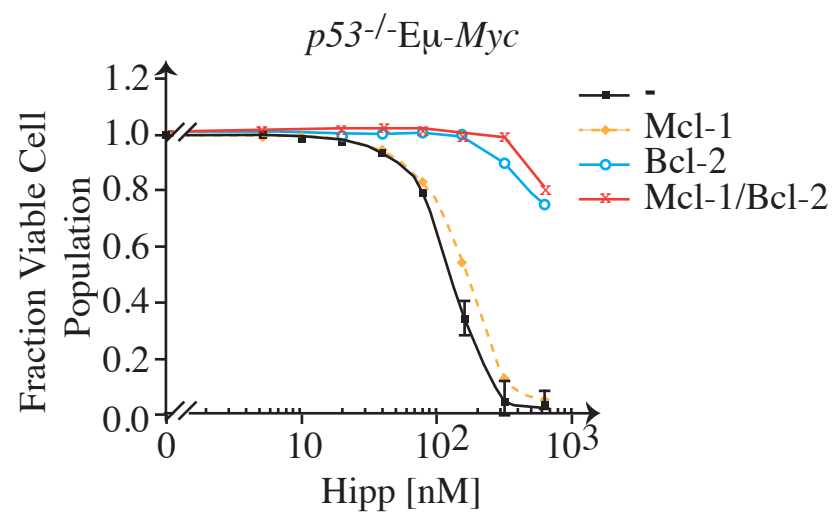**C**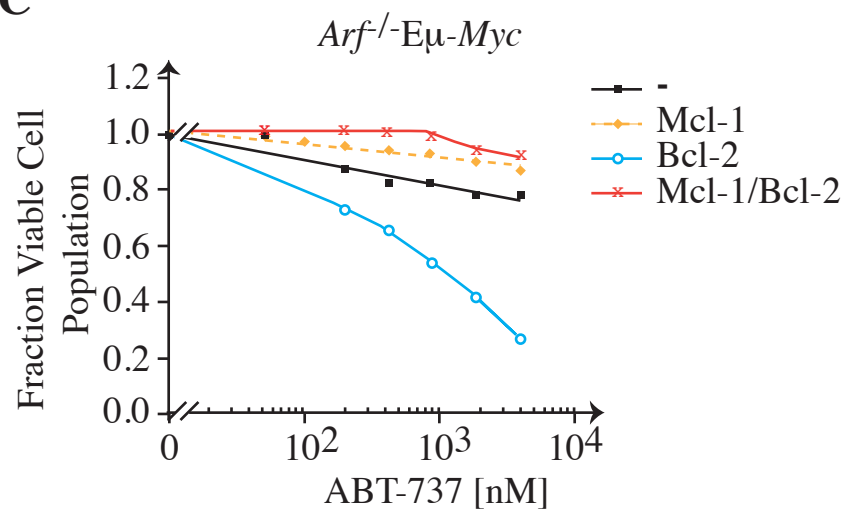**D**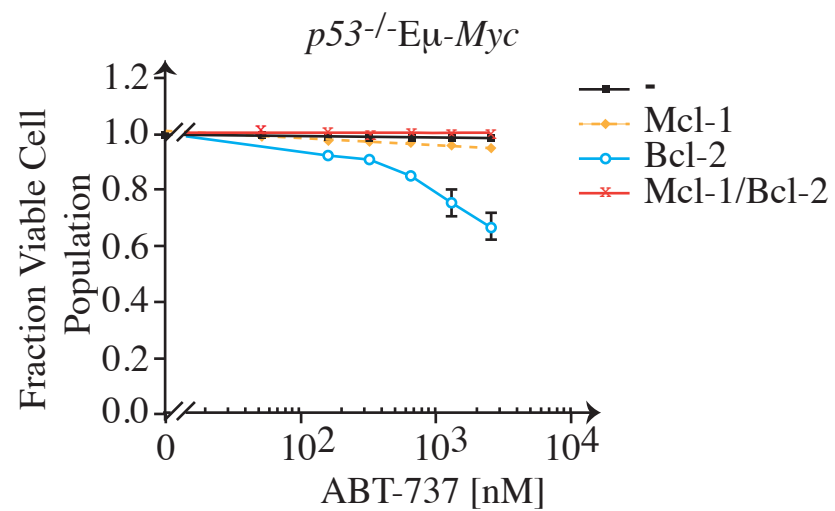

Supplement: bcj201325x4.pdf [file bcj201325x4.pdf]

A

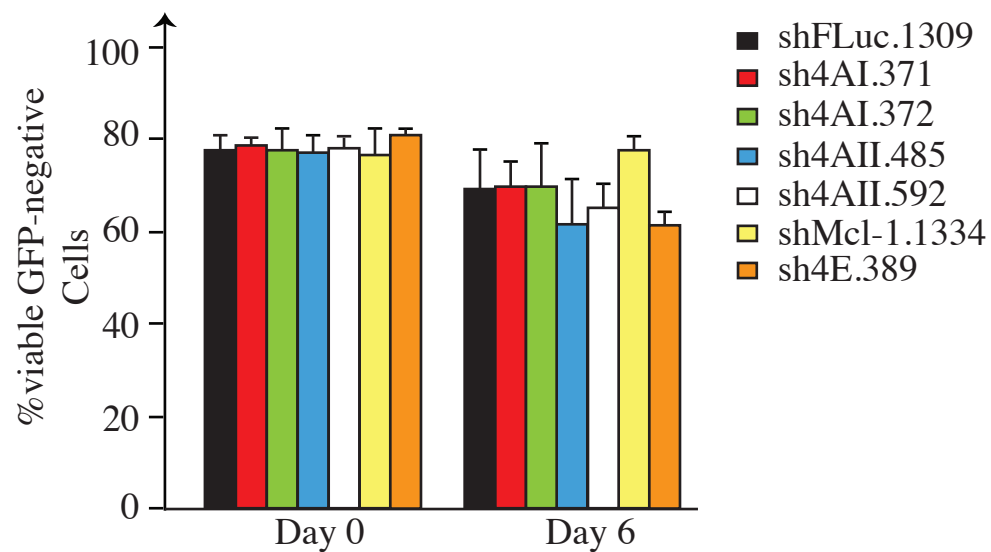

B

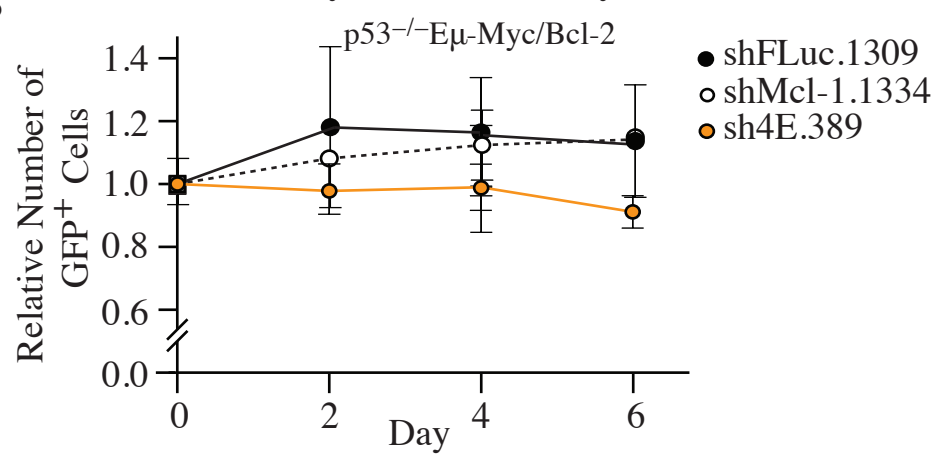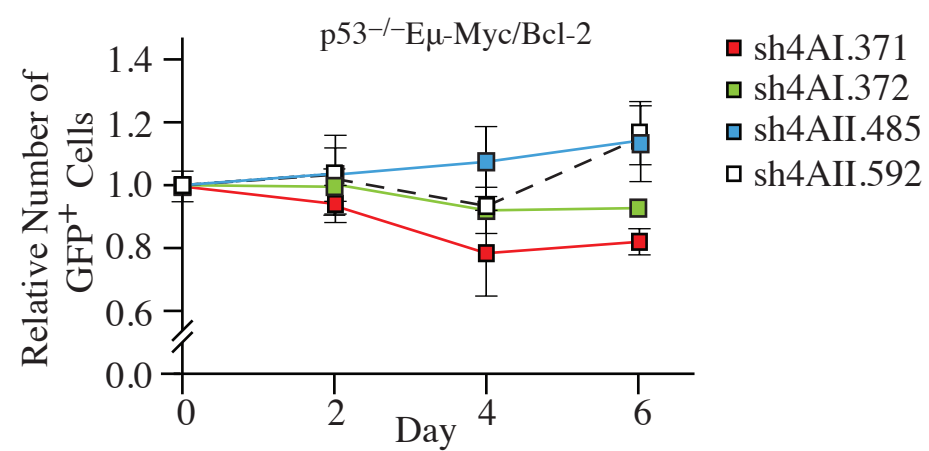

C

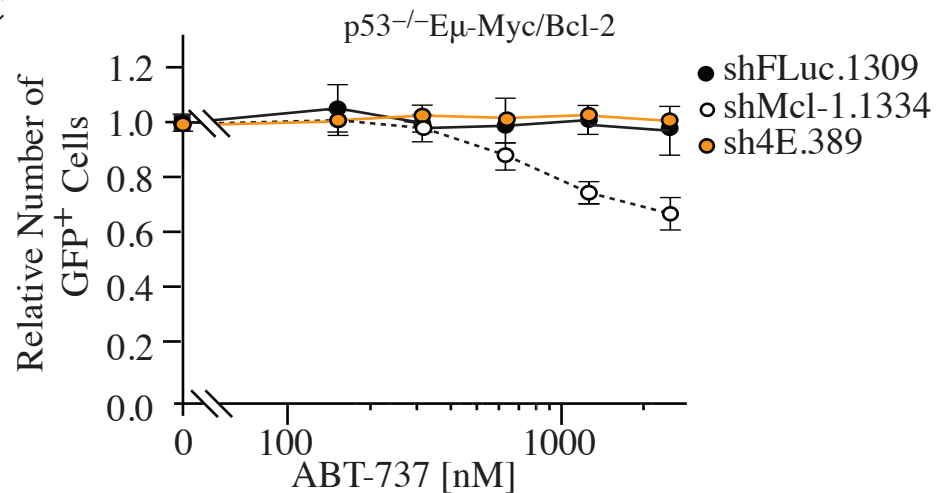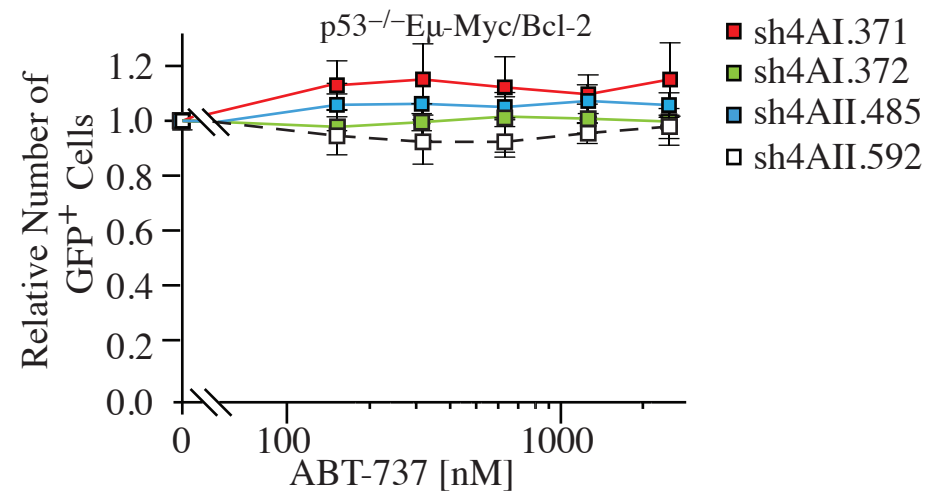

Supplement: bcj201325x7.pdf [file bcj201325x7.pdf]
